# Supplementary material for: Mutation load decreases with haplotype age in wild Soay sheep
Source: PubMed Central journal article supplement (PMC8190445; doi:10.1002/evl3.229), 2021-05-17
Supplement: EVL3-5-187-s001.pdf [file EVL3-5-187-s001.pdf]

1 **Supplementary Material**

2

3 **Mutation load decreases with haplotype age in wild Soay sheep**

4

5

6

7 Authors names and addresses:

8

9 Stoffel, M.A.<sup>1\*</sup>, Johnston, S.E.<sup>1</sup>, Pilkington, J.G.<sup>1</sup>, Pemberton, J.M<sup>1</sup>

10 <sup>1</sup>Institute of Evolutionary Biology, School of Biological Sciences, University of Edinburgh, Edinburgh,

11 EH9 3FL, United Kingdom

12

13

14

15

16

17

18

19

20

21

22

23

24

25

26

27 \* Corresponding author:

28 Martin A. Stoffel

29 Postal address: Institute of Evolutionary Biology, University of Edinburgh, Edinburgh, EH9 3FL, UK

30

31 E-mail: martin.stoffel@ed.ac.uk

32

33 **Supplementary Figures**

34  
35

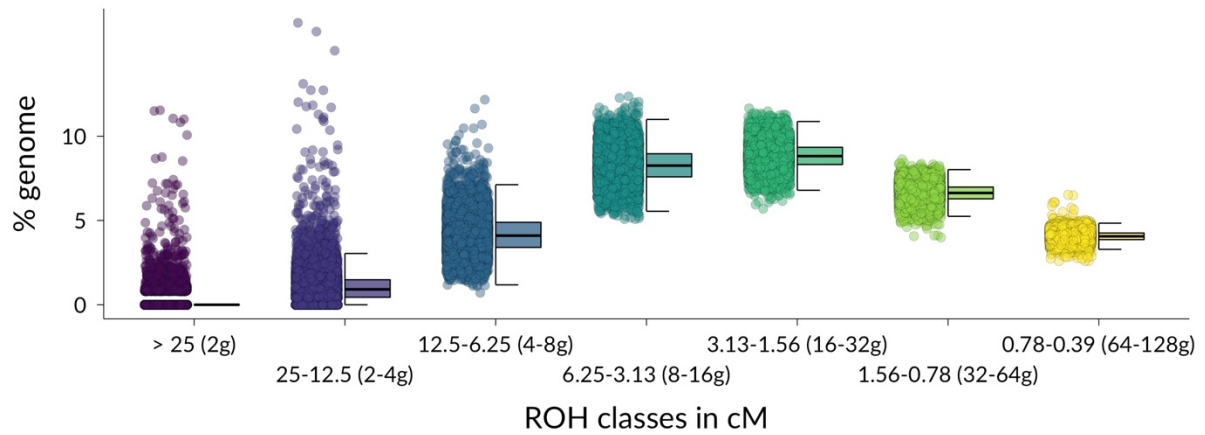

36  
37  
38  
39  
40  
41

**Supplementary Figure 1: Distribution of different ROH lengths classes in Soay sheep.** ROH were measured in cM and clustered by their expected time to most recent common ancestor ranging from 2 to 128 generations ago. Each point represents the proportion of ROH of a specific length class in the genome of an individual.

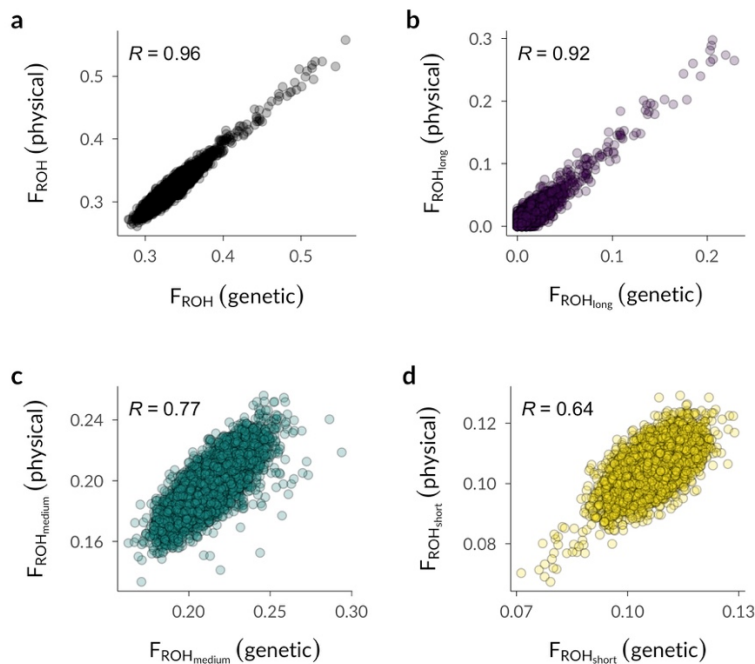

42  
43  
44  
45  
46  
47  
48  
49  
50

**Supplementary Figure 2: Correlation between genetic and physical map  $F_{ROH}$ .** Scatterplots of  $F_{ROH}$  based on genetically mapped ROH vs.  $F_{ROH}$  based on physically mapped ROH (using the same PLINK parameters) for **a** overall  $F_{ROH}$  **b**  $F_{ROH_{long}}$  (ROH > 12.5 cM) **c**  $F_{ROH_{medium}}$  (1.56 cM < ROH < 12.5) **d**  $F_{ROH_{short}}$  (ROH < 1.56 cM). Each panel also shows the Pearson correlations ( $R$ ).

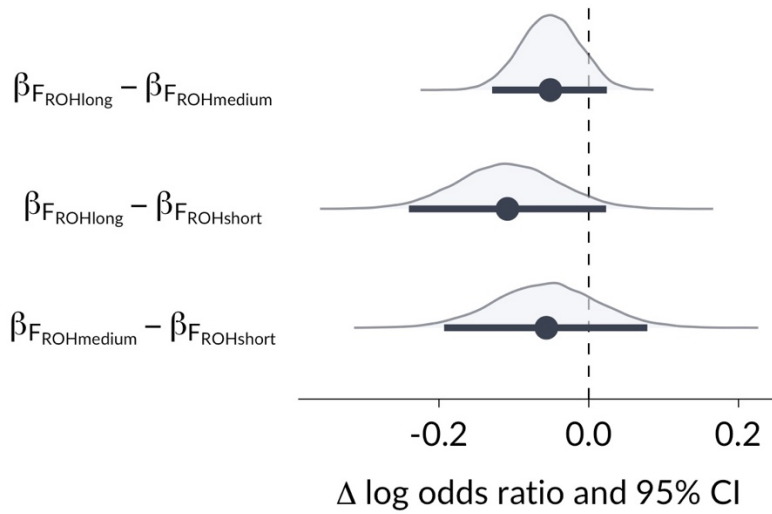

52  
53  
54  
55  
56  
57  
58  
59

**Supplementary Figure 3: Posterior distribution for the differences in effect size estimates for inbreeding depression due to long, medium and short ROH.** In contrast to Figure 2a, the differences in model estimates are shown on the untransformed log-odds (logit) scale, which facilitates visualising the differences in model estimates for inbreeding depression based on the three different inbreeding coefficients. The posterior distributions are largely negative, indicating inbreeding depression estimates based longer ROH tended to have larger (negative) effect sizes.

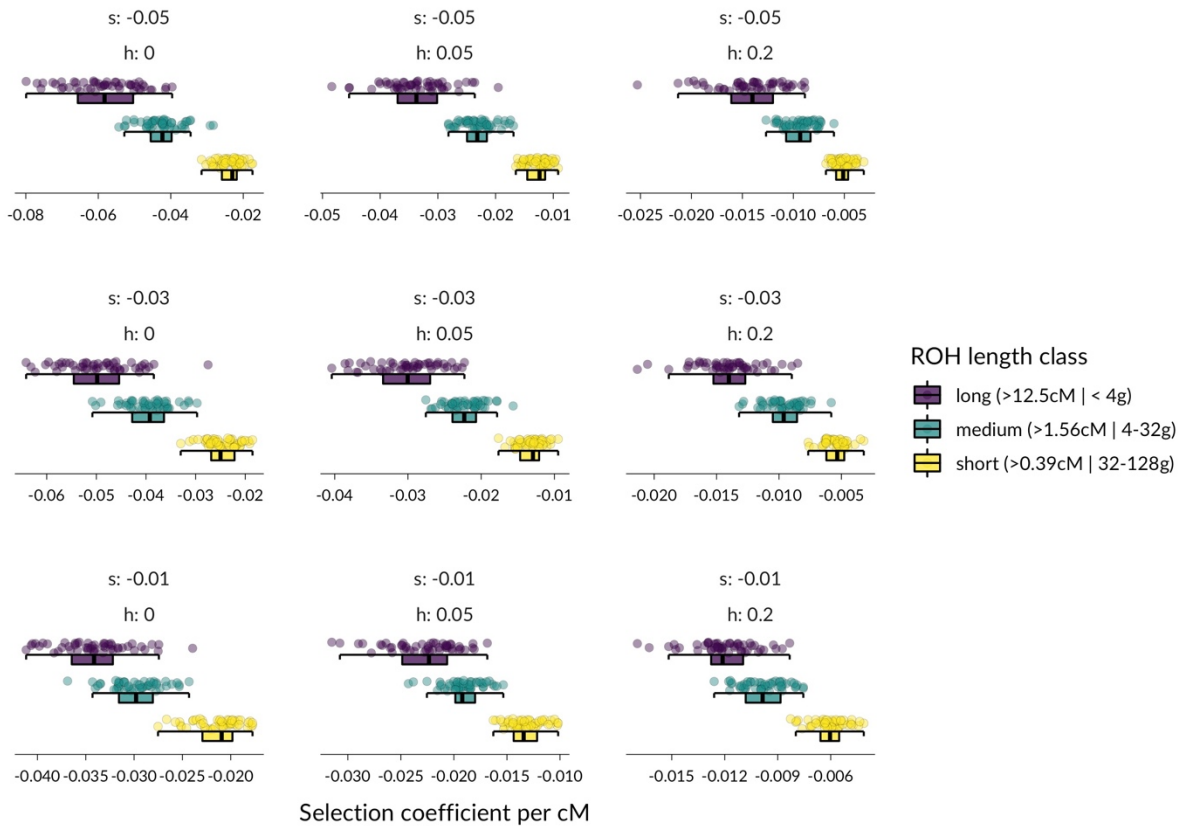

60  
61  
62  
63  
64  
65

**Supplementary Figure 4: Mutation load (selection coefficient per cM) within ROH length classes for different DFE parameters.** Each datapoint represents the average selection coefficient per cM for three ROH length classes, calculated as the mean across 200 individuals sampled at the end of each simulation. The selection coefficients for new deleterious mutations were drawn from gamma distributions with mean  $s \in \{-0.01,$

66 -0.03, -0.05} and shape 0.2 and with three different dominance coefficients  $h \in \{0, 0.05, 0.2\}$ . The results of  
67 simulations with each combination of  $s$  and  $h$  are shown in the nine panels.

68  
69  
70

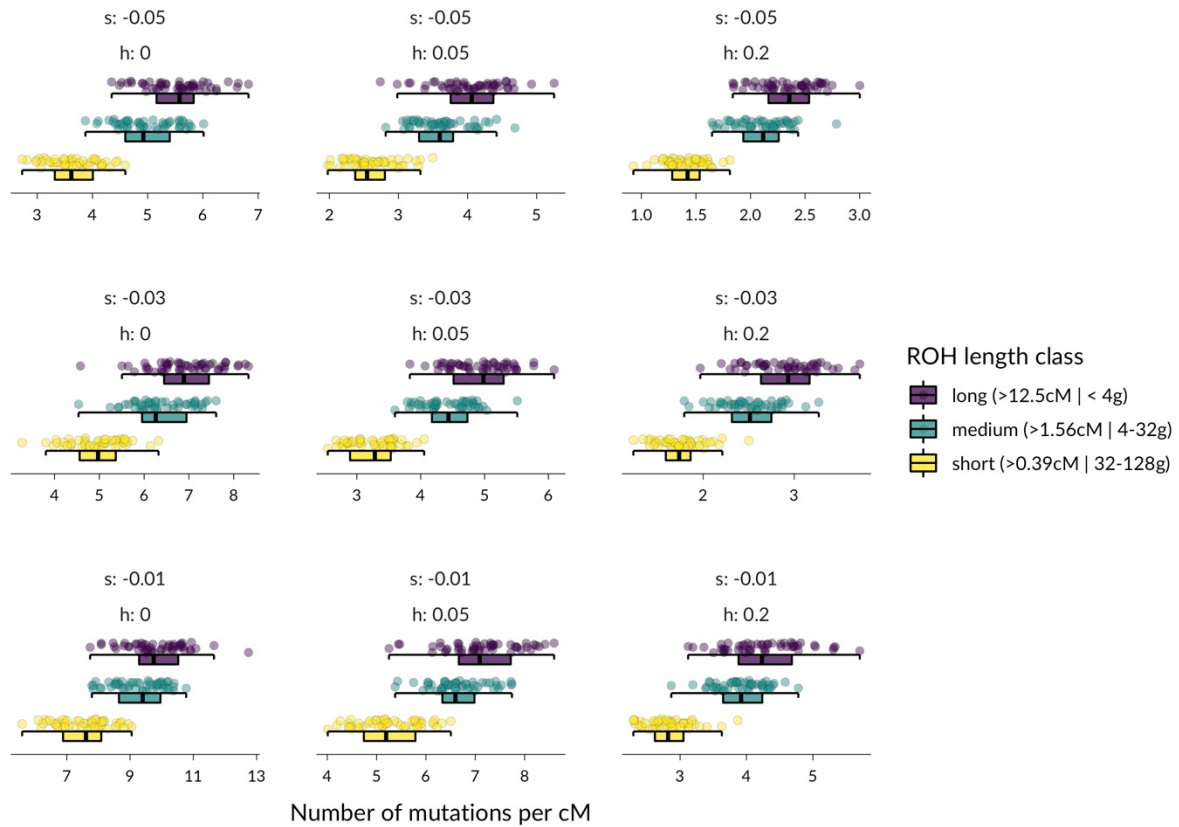

71  
72  
73  
74  
75  
76  
77  
78  
79  
80

**Supplementary Figure 5: Abundance of deleterious mutations within ROH length classes for different DFE parameters.** Each datapoint represents the number of deleterious mutations per cM for three ROH length classes, calculated as the mean across 200 individuals sampled at the end of each simulation. The selection coefficients for new deleterious mutations were drawn from gamma distributions with mean  $s \in \{-0.01, -0.03, -0.05\}$  and shape 0.2 and with three different dominance coefficients  $h \in \{0, 0.05, 0.2\}$ . The results of simulations with each combination of mean  $s$  and  $h$  are shown in the nine panels.

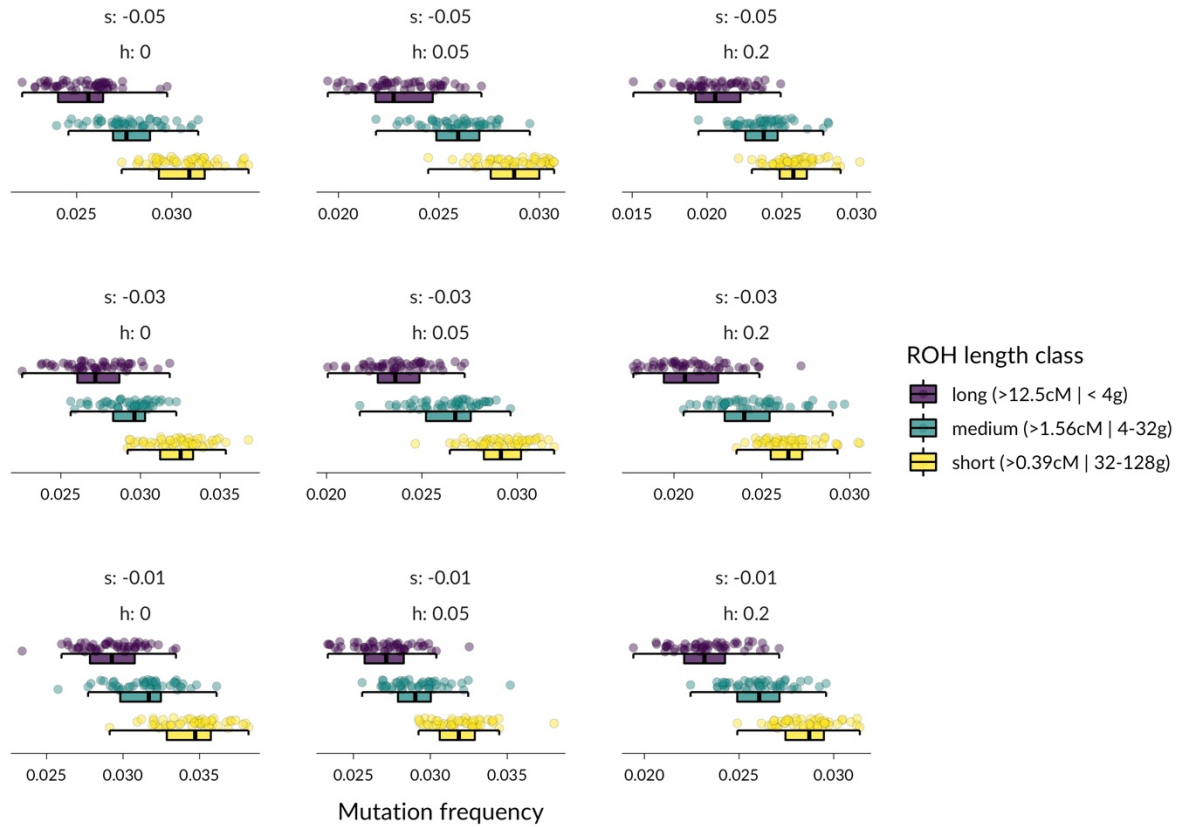

81  
 82  
 83  
 84  
 85  
 86  
 87  
 88  
 89  
 90  
 91

**Supplementary Figure 6: Deleterious mutation frequencies within ROH length classes for different DFE parameters.** Each datapoint represents the mean frequency of deleterious mutations contained in three ROH length classes, calculated as the mean across 200 individuals sampled at the end of each simulation. The selection coefficients for new deleterious mutations were drawn from gamma distributions with mean  $s \in \{-0.01, -0.03, -0.05\}$  and shape 0.2 and with three different dominance coefficients  $h \in \{0, 0.05, 0.2\}$ . The results of simulations with each combination of mean  $s$  and  $h$  are shown in the nine panels.

92  
93

## Supplementary Tables

| Term                                            | Post.Mean      | CI (2.5%)      | CI (97.5%)      | Info                              |
|-------------------------------------------------|----------------|----------------|-----------------|-----------------------------------|
| Intercept                                       | 2.423 (11.281) | 0.214 (1.239)  | 4.658 (105.385) |                                   |
| Population level/fixed effects                  |                |                |                 |                                   |
| F <sub>ROHlong</sub>                            | -0.132 (0.876) | -0.19 (0.827)  | -0.076 (0.927)  | continuous                        |
| F <sub>ROHmedium</sub>                          | -0.081 (0.923) | -0.134 (0.875) | -0.028 (0.973)  | continuous                        |
| F <sub>ROHshort</sub>                           | -0.024 (0.977) | -0.163 (0.85)  | 0.117 (1.125)   | continuous                        |
| Sex                                             | -0.67 (0.512)  | -0.825 (0.438) | -0.519 (0.595)  | categorical (0=male, 1=female)    |
| Twin                                            | -1.027 (0.358) | -1.242 (0.289) | -0.811 (0.445)  | categorical (0=singleton, 1=twin) |
| Group level/random effects (standard deviation) |                |                |                 |                                   |
| Birth year                                      | 1.992 (7.33)   | 1.501 (4.486)  | 2.661 (14.306)  | n = 1118                          |
| Mother ID                                       | 0.723 (2.061)  | 0.585 (1.795)  | 0.863 (2.369)   | n = 39                            |

94  
95  
96  
97  
98  
99  
100  
101  
102  
103  
104

**Supplementary Table 1: Model estimates for a Bayesian animal model of juvenile survival with binomial error structure and logit link.** Shown are the model estimates for the posterior mean and the lower and upper credible interval using the 2.5<sup>th</sup> and 97.5<sup>th</sup> quantile on both the logit scale and the odds-ratio scale in round brackets. The three F<sub>ROH</sub> predictors have been multiplied by 100, so that the model directly estimates the log-odds change in survival for a 1% increase in genomic ROH. The last column shows the reference levels for the categorical predictors and the number of groups for group-level effects.

| Term                                            | Post.Mean      | CI (2.5%)      | CI (97.5%)     | Info                              |
|-------------------------------------------------|----------------|----------------|----------------|-----------------------------------|
| Intercept                                       | 3.953 (52.108) | 2.521 (12.437) | 5.409 (223.51) |                                   |
| Population level/fixed effects                  |                |                |                |                                   |
| F <sub>ROH</sub>                                | -0.047 (0.954) | -0.114 (0.892) | 0.02 (1.02)    | continuous                        |
| Mean ROH length (cM)                            | -1.248 (0.287) | -2.365 (0.094) | -0.135 (0.874) | continuous                        |
| Sex                                             | -0.67 (0.512)  | -0.823 (0.439) | -0.516 (0.597) | categorical (0=male, 1=female)    |
| Twin                                            | -1.026 (0.359) | -1.242 (0.289) | -0.813 (0.444) | categorical (0=singleton, 1=twin) |
| Group level/random effects (standard deviation) |                |                |                |                                   |
| Birth year                                      | 1.988 (7.3)    | 1.496 (4.463)  | 2.655 (14.221) | n = 1118                          |
| Mother ID                                       | 0.717 (2.048)  | 0.578 (1.782)  | 0.855 (2.352)  | n = 39                            |

106

107

108

109

110

111

112

113

114

115

116

117

**Supplementary Table 2: Model estimates for an alternative Bayesian animal model of juvenile survival with binomial error structure and logit link.** Shown are the model estimates for the posterior mean and the lower and upper credible interval using the 2.5<sup>th</sup> and 97.5<sup>th</sup> quantile on both the logit scale and the odds-ratio scale in round brackets. The three F<sub>ROH</sub> predictors have replaced by an overall inbreeding coefficient F<sub>ROH</sub> including all ROH and a predictor quantifying the mean length of ROH within an individual. The negative fitness of ROH length shows that when keeping F<sub>ROH</sub> constant, individuals with longer ROH have a lower survival probability. Note that F<sub>ROH</sub> and Mean ROH length correlate highly ( $r = 0.85$ ), which is why the estimate for F<sub>ROH</sub> is relatively low. In addition, F<sub>ROH</sub> has been multiplied by 100 again, so that the log-odds ratio and odds-ratio estimate a change in survival probability for a 1% increase in ROH.

**a**

| Term                                            | Post.Mean      | CI (2.5%)      | CI (97.5%)      | Info                              |
|-------------------------------------------------|----------------|----------------|-----------------|-----------------------------------|
| Intercept                                       | 3.905 (49.658) | 2.486 (12.007) | 5.294 (199.167) |                                   |
| Population level/fixed effects                  |                |                |                 |                                   |
| F <sub>ROH</sub>                                | -0.109 (0.897) | -0.146 (0.864) | -0.071 (0.931)  | continuous                        |
| Sex                                             | -0.67 (0.512)  | -0.823 (0.439) | -0.515 (0.598)  | categorical (0=male, 1=female)    |
| Twin                                            | -1.03 (0.357)  | -1.247 (0.287) | -0.813 (0.444)  | categorical (0=singleton, 1=twin) |
| Group level/random effects (standard deviation) |                |                |                 |                                   |
| Birth year                                      | 1.967 (7.152)  | 1.482 (4.401)  | 2.632 (13.905)  | n = 1118                          |
| Mother ID                                       | 0.718 (2.051)  | 0.576 (1.779)  | 0.859 (2.361)   | n = 39                            |

**b**

| Term                                            | Post.Mean      | CI (2.5%)      | CI (97.5%)     | Info                              |
|-------------------------------------------------|----------------|----------------|----------------|-----------------------------------|
| Intercept                                       | 1.524 (4.589)  | 0.653 (1.922)  | 2.41 (11.131)  |                                   |
| Population level/fixed effects                  |                |                |                |                                   |
| F <sub>ROH</sub>                                | -0.102 (0.903) | -0.151 (0.86)  | -0.053 (0.948) | continuous                        |
| Sex                                             | -0.667 (0.513) | -0.824 (0.439) | -0.512 (0.599) | categorical (0=male, 1=female)    |
| Twin                                            | -1.029 (0.357) | -1.246 (0.288) | -0.814 (0.443) | categorical (0=singleton, 1=twin) |
| Group level/random effects (standard deviation) |                |                |                |                                   |
| Birth year                                      | 1.983 (7.264)  | 1.499 (4.476)  | 2.649 (14.142) | n = 1118                          |
| Mother ID                                       | 0.715 (2.044)  | 0.577 (1.781)  | 0.853 (2.347)  | n = 39                            |

118  
119  
120  
121  
122  
123  
124  
125  
126  
127  
128  
129  
130  
131  
132  
133

**Supplementary Table 3: Effects of genome-wide inbreeding F<sub>ROH</sub> on juvenile survival with ROH called from two different SNP densities.**

We compared the survival effects of F<sub>ROH</sub> when ROH were measured with **a** 417,373 imputed SNPs and **b** 38,130 original SNPs from the Illumina Ovine SNP50 BeadChip. To account for the lower SNP density and lower error rate in unimputed SNPs when calling ROH in PLINK using 38K SNPs, we set a higher minimum ROH length of 1.5 cM (compared to 0.39 cM in the imputed dataset), increased the possible gap between SNPs within an ROH to 0.5 cM (from 0.25 cM), and decreased allowed heterozygotes within ROH to 1 (from 2), while keeping all other parameters constant. We used the following PLINK command to call ROH in from 38K SNPs: `--homozyg --homozyg-window-snp 25 --homozyg-snp 25 --homozyg-kb 1500 --homozyg-gap 500 --homozyg-density 200 --homozyg-window-missing 2 --homozyg-het 1 --homozyg-window-het 1`. Both tables show the model estimates for the posterior mean and the lower and upper credible interval using the 2.5<sup>th</sup> and 97.5<sup>th</sup> quantile on both the logit scale and the odds-ratio scale in round brackets. F<sub>ROH</sub> was multiplied by 100, so that the model directly estimates the log-odds change in survival for a 1% increase in genomic ROH. The last column shows the reference levels for the categorical predictors and the number of groups for group-level effects.



134 **Supplementary Analysis 1**

135

136 As an alternative to quantifying the mutation load within ROH classes used in the main text, it is also  
 137 possible to quantify a measure closer to the inbreeding load by comparing inbred to outbred fitness  
 138 (Charlesworth & Charlesworth, 1987). To do this, we quantified the inbreeding load at each SNP  
 139 location using  $s_{ROH} - s_{pop}$ , where  $s_{ROH}$  is the selection coefficient of the mutation within a focal ROH  
 140 (i.e. an inbred individual).  $s_{pop}$  is the average selection coefficient at that site in the population,  
 141 calculated as  $p^2 + 2pq*(1+h*s) + (q^2 * 1+s)$ , where  $q$  is the frequency of the deleterious allele,  $p$  is  
 142 the frequency of the alternative allele,  $h$  is the dominance coefficient and  $s$  is the (negative) selection  
 143 coefficient of the deleterious allele. The overall patterns are very similar to the patterns of mutation  
 144 load within each ROH (Supplementary Figure 4). We therefore focused on mutation load in the main  
 145 text.

146

147

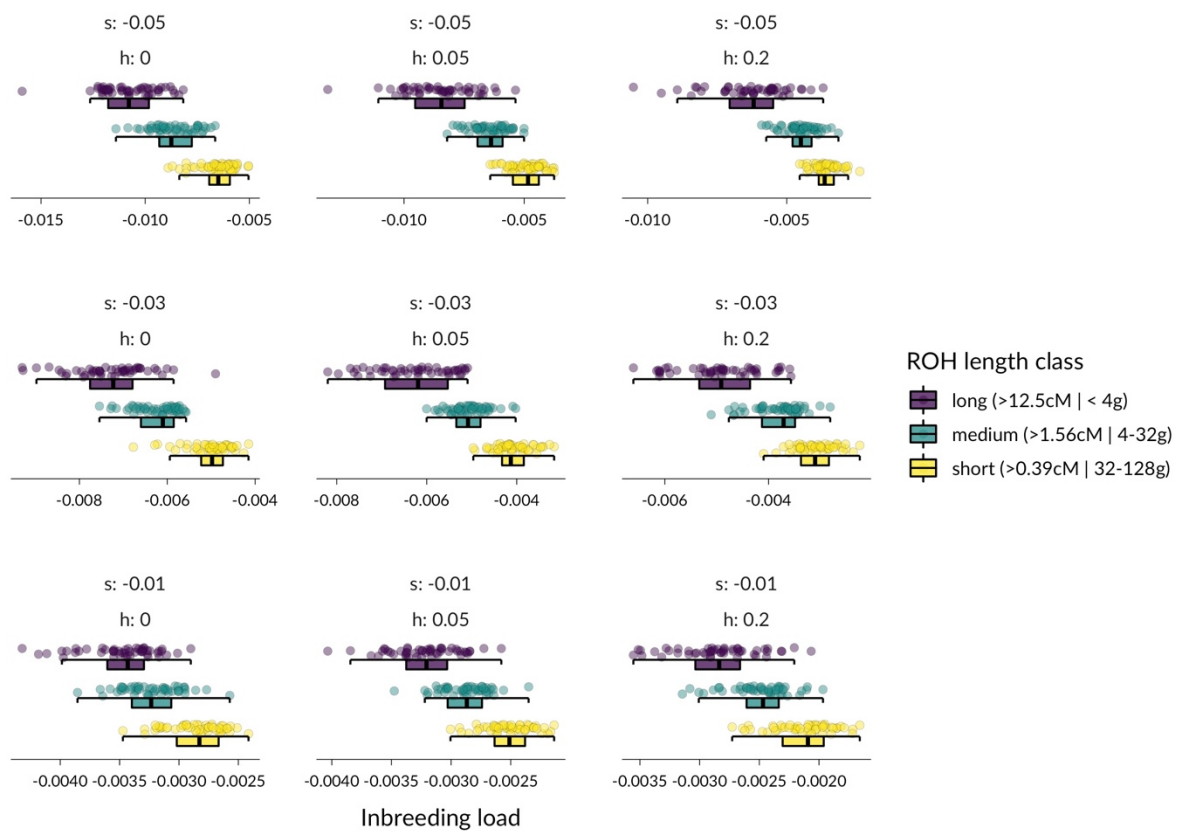

148

149

150 **Supplementary Figure 7: Inbreeding load within ROH length classes for different DFE parameters.** Each  
 151 data point represents the average inbreeding load per site within each ROH length class within a simulation  
 152 run. The selection coefficients for new deleterious mutations were drawn from gamma distributions with mean  
 153  $s \in \{-0.01, -0.03, -0.05\}$  and a shape parameter of 0.2 and with three different dominance coefficients  $h \in \{0,$   
 154  $0.05, 0.2\}$ . The results of simulations with each combination of  $s$  and  $h$  are shown in the nine panels.

155

156 **Literature**

157

158 Charlesworth, D. & Charlesworth, B. (1987) Inbreeding Depression and Its Evolutionary Consequences.  
 159 *Annual Review of Ecology and Systematics*, **18**, 237-268.

160
